# Accuracy and Power Analysis of Social Interaction Networks

Jordan D. A. Hart<sup>1</sup>, Daniel W. Franks<sup>2</sup>, Lauren J. N. Brent<sup>1</sup>, and Michael N. Weiss<sup>1,3</sup>

<sup>1</sup>Centre for Research in Animal Behaviour, University of Exeter, UK

<sup>2</sup>Departments of Biology and Computer Science, University of York, UK

<sup>3</sup>Center for Whale Research, Friday Harbour, WA, USA

## Abstract

1. Power analysis is used to estimate the probability of correctly rejecting a null hypothesis for a given statistical model and dataset. Conventional power analyses assume complete information, but the stochastic nature of behavioural sampling can mean that true and estimated networks are poorly correlated. Power analyses of animal social networks do not currently take the effect of sampling into account. This could lead to inaccurate estimates of statistical power, potentially yielding misleading results.
2. Here we develop a method for computing how well an estimated social network correlates with its true network using a Gamma-Poisson model of interaction rates. We use simulations to assess how the level of correlation between true and estimated networks affects the power of nodal regression analyses. We also develop a generic method of power analysis applicable to any statistical test, based on the concept of diminishing returns.
3. We demonstrate that our network correlation estimator is both accurate and moderately robust to its assumptions being broken. We show that social differentiation, mean interaction rate, and the harmonic mean of sampling times positively impacts the strength of correlation between true and estimated networks. We also show that the required level of correlation between true and estimated networks to achieve a given power level depends on many factors, but that 80% correlation usually corresponded to around 80% power for nodal regression.
4. We provide guidelines for using our network correlation estimator to verify the accuracy of interaction networks, and to conduct power analysis. This can be used prior to data collection, in post hoc analyses, or even for subsetting networks for use in dynamic network analysis. We make our code available so that custom power analysis can be used in future studies.

## Introduction

Understanding the form and function of social systems is a core aim of behavioural ecology, and social network analysis has become a central tool for exploring these topics (Croft et al., 2008). However, social network analysis comes with challenges unique to the field, ranging from issues of missing or censored data, through to problems of non-independence in network measures (James et al., 2009; Farine and Whitehead, 2015). Significant advances have been made in many of these areas over the last two decades, but the problem of conducting power analysis has generally received little attention, with the exception of Whitehead (2008). Power analysis is used to determine the amount of data required to reject a null hypothesis assuming a given effect size, and is used to determine how a study should be conducted prior to collecting data, or in post-hoc analysis to determine if a study was sufficiently powered to reject a null hypothesis (Cohen, 1992, 2013). Animal social network studies rarely use power analysis prior to data collection but often do employ post hoc power analysis to indicate the reliability of results (Martin et al., 1993; Stadtfeld et al., 2020). In this study, we build on previous work to develop a method for estimating the accuracy of social networks, and show how this can be used to conduct power analysis on social networks constructed from interaction rates.

Whitehead (2008) introduced a method for estimating the accuracy of animal social networks constructed from association rate data by estimating the correlation of the observed association rates with the true underlying association rates. This method has often been used as a post hoc measure to verify the robustness of animal social networks before further analyses (Findlay et al., 2016; Ellis et al., 2017). However, this method is designed specifically for association data, but there are several other common types of data used to construct animal social networks. Networks are typically built from weighted edges between nodes that encode the strengths of relationships between individuals (Krause et al., 2015). Edge weight can be quantified in a number of different ways depending on the nature of the social system and the data available. There are two types of data often used for constructing social networks: association and interaction. Association data record instances where individuals have the opportunity to interact, generally using proximity thresholds or co-detections, and interaction data record interactions such as grooming or aggression between individuals (Croft et al., 2011; Brent et al., 2013; Brask et al., 2021).

Correlation between true and estimated networks is a useful intuitive measure of the accuracy of a network, but even more importantly, it is directly related to the power of statistical analyses. Whitehead (2008) made a series of recommendations based on the social preference test developed by Bejder et al. (1998), suggesting that a good general guide for sufficient power is when the product of the squared social differentiation and mean number of observations per individual is greater than 5 (in their notation:  $S^2 \times H > 5$ ). This recommendation is based only on the social preference test, and it isn't known how well this generalises to other statistical tests commonly used in social network analysis. In particular, one of the most common methods for testing hypotheses in social network analysis is nodal regression (Croft et al., 2011). Nodal regression uses a node-level social network metric such as node strength, eigenvector centrality, or closeness to quantify an individual's position in their social structure, and relates this social position to quantifiable traits such as age or sex (Farine and Whitehead, 2015). The relationship between network metric and trait is analysed using regression (Weiss et al., 2021). The statistical power of a conventional regression depends on sample size, effect size, and significance level. In a nodal regression, sample size is the number of individuals, the true effect size is fixed and unknown, and the significance level is set by convention, usually to 0.05 (Cohen, 1994). However, the true effect size is the effect size if the nodal regression was run on the true, unknown network. The estimated network will not perfectly match the true network, meaning that the estimated effect size will deviate from the true effect size. Applying

conventional power analysis to nodal regression could therefore lead to under- or over-estimates of power, potentially yielding misleading results.

In this study we extend the method developed by Whitehead (2008) for estimating the correlation between true and estimated networks from association data to networks constructed from interaction data. Interaction data are usually collected by recording instances of pairs of individuals interacting over many sampling periods using either scan or focal sampling (Martin et al., 1993). The result is an integer count of interactions  $X_{ij}$  between each pair of individuals  $i$  and  $j$ , and a positive real-valued sampling time for each pair  $d_{ij}$ , which is simply the sum of time spent sampling at least one individual of the pair. The rate of interactions is then computed by dividing the interaction count by the sampling time, giving the interaction rate:

$$\hat{\lambda}_{ij} = \frac{X_{ij}}{d_{ij}}. \quad (1)$$

As with any empirical measure, sampling has the potential to influence the estimated interaction rate significantly (Franks et al., 2010). Consider the case when  $X_{ij}$  is 10 interactions and  $d_{ij}$  is 5 minutes, if interaction counts are Poisson-distributed, the estimate will be 2 interactions per minute, but the 95% confidence interval will be (0.8, 3.4), with a range of 2.6. Compare this to the case where  $X_{ij}$  and  $d_{ij}$  are 100 interactions and 50 minutes respectively; the point estimate is the same, but the 95% confidence interval is (1.6, 2.4), with a range of 0.8, less than one third of the range of the previous case, but for around 10 times the sampling effort. This shows that we should have less confidence in the estimate of the first case compared to the second case, and demonstrates how the estimated network could deviate significantly from the true network because of low sampling time. The magnitude of this deviation will impact the reliability of an analysis, and ideally should be taken into account when conducting social network analyses.

We demonstrate that our method for interaction data provides accurate estimates of correlation between true and estimated networks in realistic scenarios, and we use simulations to suggest guidelines for the minimum level of correlation required for nodal regression depending on the desired level of statistical power. We also develop a generic alternative approach for guiding data collection based on the principle of diminishing returns that can be used for any type of statistical analysis, including but not limited to nodal regression. We contrast our guidelines to those from Whitehead (2008) to show that the amount of sampling required depends on the type of data, and that data-specific guidelines may be highly useful when designing and conducting social network analysis. We have made code and examples for this study publicly available at [www.github.com/JHart96/power\\_analysis\\_interaction\\_networks](http://www.github.com/JHart96/power_analysis_interaction_networks).

## Methods

By modelling interaction counts as being distributed according to a Gamma-Poisson process, we are able to analytically derive the correlation between sampled networks and true networks. We verify this correlation equation using simulations which either follow the assumptions of the model, or break them to varying degrees, to test the robustness of the method. Following this, we use simulations to determine the level of correlation required to obtain a desired level of power when performing nodal regression on interaction networks.

## Gamma-Poisson model of dyadic interactions

As sampling time increases, we expect that the estimated interaction rate  $\hat{\lambda}_{ij}$  will get closer to the true interaction rate  $\lambda_{ij}$ . However for lower sampling times there may be a considerable error between the estimated and true interaction rate. This error can be modelled by treating the interaction counts  $X_{ij}$  as draws from a Poisson distribution. Since the underlying true interaction rates  $\lambda_{ij}$  are unknown, we assume the true interaction rates of the dyads are drawn from a gamma distribution:  $\lambda_{ij} \sim \text{Gamma}(\alpha, \beta)$ . A Poisson-distributed random variable with rates drawn from the gamma distribution is equivalent to a random variable following the negative binomial distribution, therefore the number of observed interactions  $X_{ij}$  is given by:

$$X_{ij} \sim \text{NegBinomial}\left(\alpha, \frac{\beta}{\beta + d_{ij}}\right). \quad (2)$$

Using this, we can estimate the variance of both the true and estimated interaction rates, which allows us to estimate the Pearson's correlation coefficient,  $\rho$ , between them:

$$\rho(\lambda, \hat{\lambda}) = \frac{S\sqrt{\mu H(d)}}{\sqrt{1 + \mu S^2 H(d)}} = \frac{S\sqrt{I}}{\sqrt{1 + S^2 I}} \quad (3)$$

where  $S = 1/\sqrt{\alpha}$  is the social differentiation,  $\mu = \alpha/\beta$  is the dyadic mean interaction rate,  $H(d)$  is the harmonic mean of the sampling times  $d_{ij}$ , and  $I = \mu H(d)$  reflects the sampling effort. The harmonic mean  $H(d)$  of the  $m$  dyads is defined as  $H(d) = m / \sum_{i,j} d_{ij}^{-1}$ , and is equal to the arithmetic mean only in the case where all  $d_{ij}$  are equal. Note that when sampling time  $d_{ij}$  is even across all dyads, sampling effort  $I$  is the number of interactions observed per dyad. When sampling time  $d_{ij}$  is uneven, sampling effort  $I$  will be lower, and more sampling time will be required to reach the same sampling effort as the equivalent network with evenly-sampled dyads. The correlation is computed only over dyads that have non-zero sampling times.

The parameters  $\alpha, \beta$  of the underlying gamma distribution can be estimated numerically using maximum likelihood to obtain point estimates, or alternatively they can be estimated using an MCMC algorithm such as Gibbs sampling to obtain estimates of their credible intervals (Hammersley, 2013). We use the maximum likelihood approach in this study to reduce computation time, and to avoid model fitting problems, but we have included a Gibbs sampling version in the code, to allow the confidence intervals of the correlation to be estimated.

## Simulations 1: Verification of the Gamma-Poisson model

To confirm that Equation 3 is appropriate for interaction rate data, and to determine how robust it is to the Gamma-Poisson assumptions being broken, we ran simulations under three different scenarios. These scenarios follow or break the assumptions of Equation 3 to varying degrees (see Table 1 for more details). The parameter space of these models was explored using a random search for  $S \in (0, 2]$  and  $\mu \in (0, 10]$ . For scenario 2, an additional constraint was applied such that interaction rates are stronger between members of the same group than between members of different groups. The simulations proceeded as follows:

1. Data were generated according to one of the scenarios outlined in Table 1.
2. The true correlation between  $\lambda$  and  $\hat{\lambda}$  was computed.

| Scenario | Description                                                                                                                                                                                                   | Model                                                                                                                                                                 |
|----------|---------------------------------------------------------------------------------------------------------------------------------------------------------------------------------------------------------------|-----------------------------------------------------------------------------------------------------------------------------------------------------------------------|
| 1        | Follow the assumptions of the model exactly, with gamma distributed interaction rates and Poisson distributed interaction counts.                                                                             | $X_{ij} \sim \text{Poisson}(\lambda_{ij}d_{ij})$<br>$\lambda_{ij} \sim \text{Gamma}(\alpha, \beta)$                                                                   |
| 2        | Introduce community structure with two classes of dyads: same or different group. The two classes have two different parameterisations of the gamma distribution. Interaction counts are Poisson-distributed. | $X_{ij} \sim \text{Poisson}(\lambda_{ij}d_{ij})$<br>$\lambda_{ij} \sim \text{Gamma}(\alpha_{k_{ij}}, \beta_{k_{ij}})$<br>$k_{ij} \sim \text{Bernoulli}(p)$            |
| 3        | Simulating sparse networks by modelling interaction counts as a zero-inflated Poisson with a sparsity $(1 - \pi)$ .                                                                                           | $X_{ij} = Z_{ij}Y_{ij}$<br>$Y_{ij} \sim \text{Poisson}(\lambda_{ij}d_{ij})$<br>$\lambda_{ij} \sim \text{Gamma}(\alpha, \beta)$<br>$Z_{ij} \sim \text{Bernoulli}(\pi)$ |

Table 1: Simulation models used for verifying the Gamma-Poisson model, where simulation 1 follows the assumptions perfectly, but simulations 2 and 3 break the assumptions in different ways. The amount of sampling time  $d_{ij}$  for each dyad is drawn from a Poisson distribution. In model 2 the probability of a dyad belonging to the same group is given by  $p$ .

3. The parameters  $\mu$  and  $S$  were estimated using maximum likelihood and used to compute the estimated correlation  $\rho(\lambda, \hat{\lambda})$  between  $\lambda$  and  $\hat{\lambda}$ .
4. The correlations were recorded and the process was repeated 200 times.

The relationship between the true and estimated network correlations was quantified by computing the Pearson correlation coefficient, the mean absolute error, and the standard deviation of the error.

## Simulations 2: Statistical power of nodal regression

We ran simulations to test how statistical power relates to sampling effort in the case where the true effect size is the minimum required to achieve 100% power. This made it possible to see the effect of sampling effort without the effect being hidden behind under- or over-powered tests. To simulate data collection we followed the core assumptions of the model: that dyad-level interaction rates are drawn from a gamma distribution, and observations are made such that interaction counts follow a Poisson distribution. Sampling time for each dyad was modelled as the number of sampling periods, which was drawn from a Poisson distribution with mean  $D \in [10, 10000]$ . The dyad-level interaction rates were converted to an edge list from which the true network was built. Node strength  $s_i$  was used as the node-level network metric for these simulations. A linear relationship between network metric and individual trait was created by assigning traits  $t_i$  to each individual  $i$  according to a linear equation  $t_i = a + bs_i + \epsilon_i$ , where  $a$  is the equivalent of an intercept term,  $b$  encodes the relationship between metric and trait, and  $\epsilon_i$  is a normally-distributed noise term:  $\epsilon_i \sim N(0, 1)$ . The value of the effect  $b$  was set depending on the number of nodes  $n$ . This was determined using a preliminary simulation in such a way that the value of  $b$  for a given number of individuals was equal to the lowest value for which a power  $\geq 99.9\%$  can be achieved.

Networks were estimated using Equation 1 and node strength was estimated from the corresponding estimated networks. To estimate the relationship  $b$ , a simple linear regression was fitted to

the simulated data, and node-label permutations were used to calculate the p-values (R Core Team, 2013; Croft et al., 2011). The power of the nodal regression was computed for each set of parameters by repeatedly assigning traits  $t_i$  according to the true network, fitting a linear model to an estimated network, and computing the p-value of the estimated relationship. The proportion of p-values less than 0.05 gave the power of the test for the current set of parameters. We searched the parameter space using a random search to assess the relationship between network correlation, statistical power, and the number of individuals.

Finally, to provide guidelines on the level of correlation required in a nodal regression, LOESS curves approximating the relationship between correlation and power for different numbers of individuals were fitted to the simulated data (Cleveland, 1979; R Core Team, 2013). The resulting curves were used to predict the level of network correlation required to achieve 80% power, assuming the underlying relationship has power  $\approx 100\%$ .

### Simulations 3: Optimal network correlation estimator for generic tests

The relationship between network correlation (Equation 3) and statistical power is affected by several factors, many of which will depend on the type of analysis being conducted. The relationship between power and correlation was explored in detail for nodal regression in the previous section, but simulation-based studies like this are limited to the analyses they focus on, and cannot generalise to other methods. However we can expect that as network correlation increases, the power of any statistical tests should also improve (or at least stay the same). Assuming that increases in network correlation positively affect statistical power, and that increases in sampling effort come at a cost to researchers, the problem of finding the optimal sampling effort can be seen as finding the point at which increases in sampling effort lead to diminishing returns.

Diminishing returns describes how the rate of increase of one variable decreases as another variable increases (Shephard and Färe, 1974). In our case the aim is to find the point at which increases in sampling effort lead to diminishing increases in correlation. This is the same problem as finding the “elbow point” of the relationship between correlation and sampling effort. There is no guarantee of the power of the analysis at the elbow point, but we do know that additional sampling would provide increasingly small gains in correlation. Since collecting behavioural data is generally time-consuming, financially expensive, and may even have ethical implications, assuming a cost to increases in sampling effort allows us to use the elbow point as an estimate for the optimal level of correlation and corresponding amount of sampling (Martin et al., 1993).

The elbow of the curve can be computed numerically by rotating the curve of  $\rho$  against  $I$  by  $\theta$  radians about the origin (0.0, 0.0) and finding the maximum point of the rotated curve. The angle  $\theta$  is usually determined by the maximum point of the curve, but in our case  $\rho$  is asymptotic to 1.0, so no maximum exists. We can get around this problem by introducing a free parameter  $\rho_{\text{MAX}}$  to describe the effective maximum correlation to be used for computing the elbow. The choice of  $\rho_{\text{MAX}}$  encodes the minimum acceptable trade-off between increases in correlation and increases in sampling effort, and therefore will affect the estimated elbow point. However, using a value of  $\rho_{\text{MAX}}$  sufficiently high that we would consider a sampled network to be negligibly different to the true network (for biological purposes) represents a meaningful choice since increases in correlation beyond  $\rho_{\text{MAX}}$  would add no further value for our purposes. We use a value of  $\rho_{\text{MAX}} = 0.99$  for our analysis, but a brief exploration of the impact of this choice is included in the supplementary material.

To assess the levels of power obtained by using the optimal correlations, we simulated nodal regression analyses for different levels of social differentiation  $S \in (0.0, 0.5]$  and sampling effort  $I \in (0, 500]$  using a similar setup as the previous section. The power of the analysis for each simulated

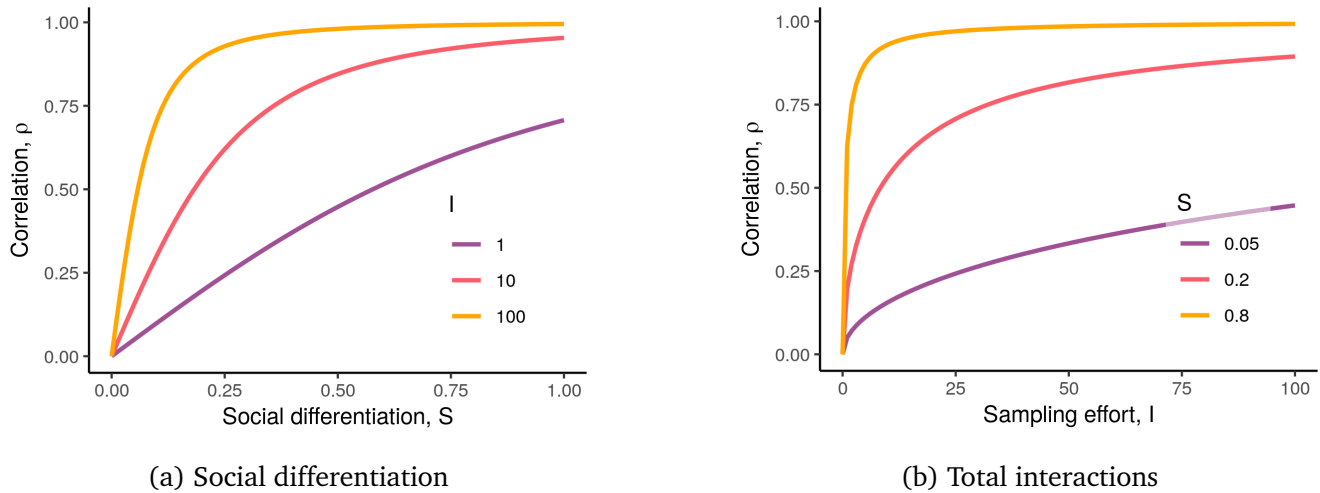

Figure 1: Plots of Equation 3 against social differentiation  $S$  and sampling effort  $I = \mu H(d)$  for different levels of sampling and social differentiation respectively. This shows that for relatively low levels of social differentiation around  $S = 0.25$ , a high level of sampling effort around  $I = 100$  is required to achieve a correlation of  $\rho = 0.90$ . It also shows that for low social differentiation of  $S = 0.05$ , even high levels of sampling effort of  $I = 100$  will not yield a correlation of  $\rho = 0.90$ .

“true” network was computed, and the proportion of networks with lower than the optimal level of correlation with power greater than 80% were calculated. This was repeated for the proportion of networks with the same or higher than the optimal level of correlation. This provides a descriptive measure of the performance of the optimal correlation at estimating the sampling required to achieve 80% power. This level of power was chosen from convention, but there is no reason that the optimal correlation estimator should obey this convention as it is based on a different concept to conventional power analysis. We also estimated the level of power that most closely matched the estimator for nodal regression analysis using a grid search.

## Results

### Gamma-Poisson model of dyadic interactions

The analytical equation for estimated network correlation given by Equation 3 was used to produce the plots in Figure 1 of network correlation against social differentiation and sampling effort. This shows that, as expected, correlation increases towards an asymptote at 1.0 with both social differentiation  $S$  and sampling effort  $I$ . Lower numbers of interactions ( $I = 1$ ) did not reach a correlation of 1.0 even for high levels of social differentiation ( $S = 1.0$ ). Higher sampling efforts of  $I = 100$  reached close to a correlation of 1.0 even at low levels of social differentiation,  $S < 0.25$ . This shows that social differentiation is an important factor in estimating the correlation of a sampled network, which is in line with the findings of Whitehead (2008). The results show that relatively low values of  $S \approx 0.25$  are required to make achieving a high level of network correlation feasible, but that lower values of social differentiation ( $S = 0.05$ ) require higher sampling effort ( $I > 100$ ) to achieve even 50% correlation.

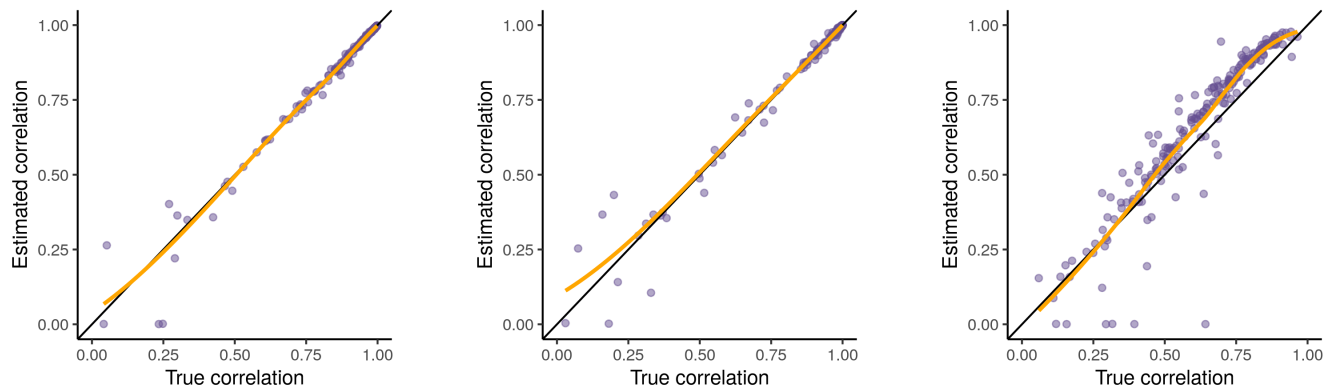

(a) Scenario 1: Gamma interaction rates

(b) Scenario 2: Community structure

(c) Scenario 3: Zero inflated interaction rates

Figure 2: Comparisons of the true correlations between interaction rates and the correlations estimated using Equation 3. The black line is diagonal and shows the ideal relationship between the true and estimated correlations. In these visualisations the three models were run with different maximum social differentiation parameters to ensure the full distribution of correlations was visible, these were 0.20, 0.01, and 1.00 for models 1, 2, and 3 respectively. In each of these models the true and estimated correlations are closely related, with few major deviations. The yellow lines show the general relationship using LOESS curves fitted to the points.

## Simulations 1: Verification of the Gamma-Poisson model

The results of our simulations (see Figure 2) show that true and estimated correlation match closely across the parameter space. Over the full parameter space outlined in Table 1, the mean absolute error between the true and estimated correlations was 5.5%, 0.047%, and 3.5% for scenarios 1, 2, and 3 respectively. The standard deviations of the errors for the three scenarios were 0.0084, 0.0038, and 0.047 respectively, and the correlations between the true and estimated network correlations were 99%, 99%, and 96% respectively. The relationship between true and estimated correlation is shown in Figure 2 over a limited part of the parameter space, where the social differentiation was adjusted manually to visualise the full width of the distribution of correlations. Social differentiation was used to adjust the mean level of correlation purely for visualisation purposes, and was not used when computing the descriptive statistics.

## Simulations 2: Statistical power of nodal regression

The results of the nodal regression simulation are shown in Figure 3 for four different network sizes (10, 20, 50, 100). The relationship between correlation and power is approximately logistic, with a higher power for networks with larger numbers of nodes across the range of correlations. Large gains in power could be seen for networks with 20 nodes against those with 10 nodes (37% versus 27% respectively, at a correlation of 50%), whereas networks with 100 nodes against 50 nodes had a much smaller gain in power (55% versus 51% respectively, again at a correlation of 50%). To attain a statistical power of the conventional 80%, correlations of 81%, 78%, 69%, and 65% were required for network sizes 10, 20, 50, and 100 respectively. The maximum required level of correlation to achieve 80% statistical power was 81% (for  $n = 10$ ).

Table 2 shows the sampling effort  $I$  required to achieve 80% power, depending on the social



differentiation  $S$  and size of a network  $n$ . For systems with low levels of social differentiation and low network sizes, high sampling effort ( $I = 530$  for  $n = 10, S = 0.05$ ) is required. However, as social differentiation increases, much lower sampling effort is required ( $I = 5.3$  for  $n = 10, S = 0.5$ ). This reflects the findings shown in Figure 1. Larger network sizes also have an effect on the required amount of sampling, with  $n = 100$  requiring less than half the sampling effort as  $n = 10$ .

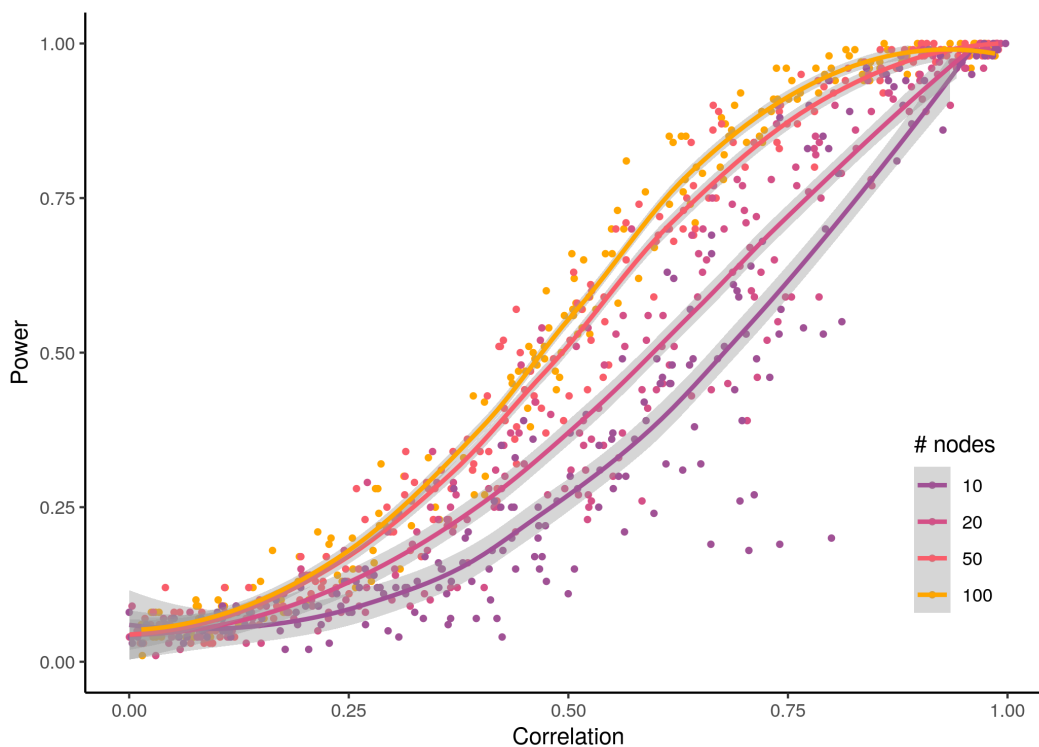

Figure 3: The relationship between estimated network correlation and statistical power for various numbers of nodes over 1000 simulations, where the minimal effect size was chosen such that power was  $\geq 99.9\%$ . Power and correlation are monotonically related in a relationship that resembles a logistic curve. Larger numbers of nodes achieved a higher power for a lower correlation than smaller numbers of nodes, as is expected in a nodal regression where sample size is equal to the number of nodes. A statistical power of 80% is common by convention, and was generally achieved for all simulated networks with at least 10 nodes for network correlations greater than 80%.

### Simulations 3: Optimal network correlation estimator for generic tests

The powers of the nodal regression analyses for this simulation were split into five even groups between 0% and 100%, with the top group of 80 - 100% being the desired power, by convention. The results of the simulations are shown in Figure 4 with the optimal sampling effort overlaid. The optimal sampling effort for low levels of social differentiation ( $S < 0.1$ ) was in excess of a sampling effort of  $I = 500$ . For slightly larger values of social differentiation ( $0.1 \leq S \leq 0.2$ ), the required sampling effort drops quickly from approximately  $I = 500$  to  $I = 100$ . The sampling effort for larger values of social differentiation quickly asymptotes towards zero.

The optimal sampling effort generally fell around the boundary between power levels of 60 - 80% and 80 - 100% for the nodal regression analyses. Considering the curve as a classifier of under- and over-powered analyses, using a power of 80% as the boundary between the two, 50.3% analyses

| $S$  | $n$   |      |        |       |
|------|-------|------|--------|-------|
|      | 10    | 20   | 50     | 100   |
| 0.05 | 530   | 410  | 230    | 200   |
| 0.2  | 33    | 26   | 14     | 12    |
| 0.5  | 5.3   | 4.1  | 2.3    | 2     |
| 0.8  | 2.1   | 1.6  | 0.89   | 0.77  |
| 2    | 0.33  | 0.26 | 0.14   | 0.12  |
| 10   | 0.013 | 0.01 | 0.0057 | 0.005 |

Table 2: Required sampling effort  $I = \mu H(d)$  to achieve a statistical power of 80% for networks with social differentiation  $S$  and number of nodes  $n$ . Relatively low numbers of interaction observations are required to achieve 80% power for levels of social differentiation of 0.5 and higher.

below the curve were under-powered, and 99.9% of the analyses above the curve were adequately- or over-powered. In the context of our simulated nodal regressions, the curve was relatively conservative, with the power level that most closely corresponded to the power of the optimal correlations being 90%.

## Discussion

In this study we showed that sampling effort can have a major impact on the accuracy of social interaction networks. We showed that this can severely affect the power of statistical analyses, and demonstrated how to carry out power analysis by accounting for sampling effort in both linear regression analyses and generic statistical analysis. We derived an equation to describe how well a sampled network correlates with the true underlying network using a Gamma-Poisson model of interaction counts. We showed that the equation is a good estimator of the true correlation, and is robust to the assumptions of the model being moderately broken. We used simulations of nodal regression analyses to find the relationship between network correlation and statistical power. Additionally we developed an estimate for the optimal level of correlation required for generic analyses by using the concept of diminishing returns, where increases in network correlation come at the cost of increasing levels of sampling effort. We showed that this can be used as an alternative to conventional power analysis by verifying the results against the nodal regression simulations.

The nodal regression simulations suggested that a reasonable level of correlation to achieve at least 80% power is also around 80%. This value of correlation has precedent in the behavioural sciences, and would be categorised as “very strong” by Evans (1996). However we arrived at this value through the use of simulations, and would advise careful application of this guideline for different nodal regression-based analyses, and discourage its use on other types of analysis. We believe it is particularly important to note that in our simulations we used the smallest possible effect sizes required to achieve approximately 100% power. This is highly unlikely in the real world, with the true effect size either being lower, in which case no amount of sampling will be able to obtain full power, or the effect size being higher, in which case lower sampling efforts will be able to obtain full power. For this reason, we suggest using the code we have made available to run a custom power analysis for any specific study.

An alternative method for calculating the required level of correlation is to use the diminishing returns-based optimal correlation estimator. In the nodal regression simulations it proved to be

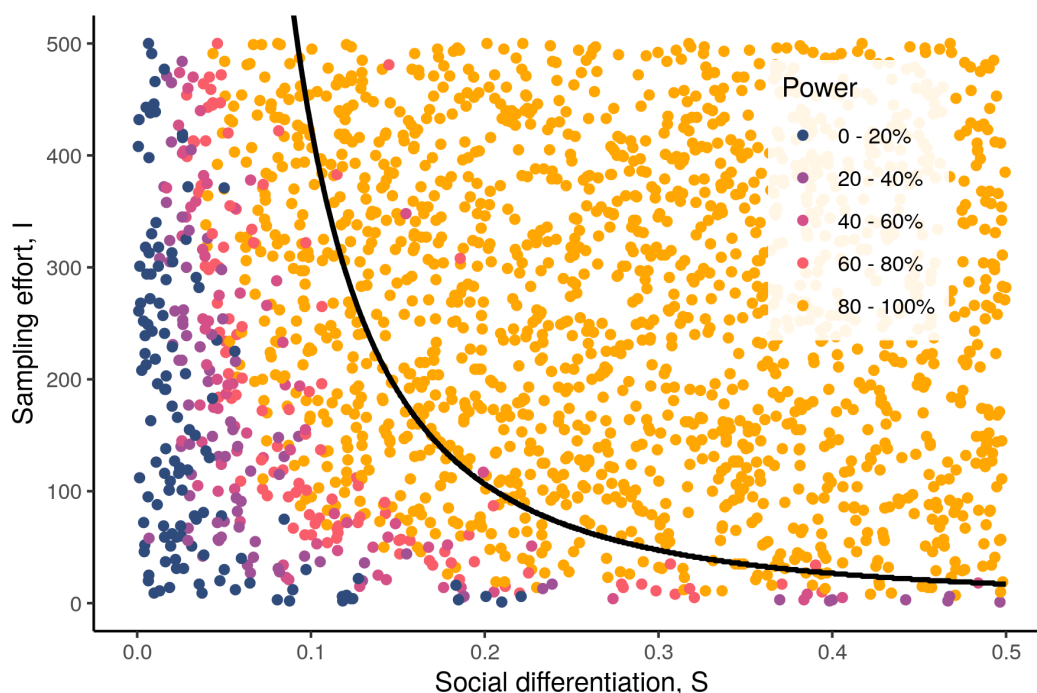

Figure 4: Power of nodal regression analyses for networks with varying levels of social differentiation  $S$  and sampling effort  $I$ . The black line shows the optimal sampling effort estimated using the diminishing returns method, corresponding to the optimal correlation as social differentiation increases. This can be viewed as a classifier where analyses below the line are under-powered, and analyses above the line are adequately- or over-powered.

a conservative classifier of analysis power, often suggesting that more samples were required than would have been necessary to obtain a power of 80%, and was more in line with a desired power level of 90% in this specific simulation. Since the estimator is based on diminishing returns, it implicitly models the trade-off between lower sampling variance and the cost of sampling, which is a fundamental part of behavioural data collection. For this reason, we believe this generic estimator to be a useful tool for generating estimates of the amount of sampling required, and in making few assumptions, it is flexible, allowing it to be used for any type of social network analysis. Another strength of the method is that knowledge of the desired statistical power is not required. Power can often be difficult to define, and is therefore usually treated as a nuisance parameter when conducting power analyses, with researchers reverting to conventions such as 80%. The free parameter  $\rho_{\text{MAX}}$  could be considered a similar theoretical limitation to this method, but we view it as the maximum value of correlation a researcher is interested in. We chose  $\rho_{\text{MAX}} = 0.99$  because the final increase in correlation by 0.01 from 0.99 to 1.00 is unlikely to be of biological or practical interest, though other values could be used depending on the specific context. We suggest that for nodal regression, the simulations we have provided will be a more precise tool, but for other types of analyses, or where the desired power level is difficult to define, the generic estimator will give a good guide to the amount of sampling needed. The two methods can also be used in conjunction with each other to gain additional understanding about the power of an analysis.

The inspiration for this work, Whitehead (2008), suggested a guideline sampling effort for the social association test of  $S^2 \times H > 5$ , where  $H$  is the mean number of observed interactions per individual (Bejder et al., 1998). This is a classifier analogous to the classifier shown in Figure 4 for

determining the required level of sampling effort for a given value of social differentiation to achieve a sufficiently-powered analysis. An obvious difference between the shapes of the two classifiers is that Whitehead's is linear, and ours is highly non-linear. The original was determined "by eye" whereas ours was calculated using a LOESS curve, so sampling and fitting differences could be responsible for some of the discrepancies. However, we found that the number of interactions observed per dyad was the important factor for the classifier, whereas Whitehead (2008)'s guidance suggested that  $H$  – the number of interactions per individual – was the important factor. This is a key point because unless a strict sampling regime is used, sampling is unlikely to be even across dyads and nodes, and a subset of well-sampled individuals that share connections might be over-sampled, while other dyads remain severely undersampled. This is taken into account by the definition of sampling effort,  $I = \mu H(d)$ , since the harmonic mean is lower than the arithmetic mean for unevenly sampled dyads. The previous study showed that this was unimportant in the case of association data on a specific test, but we found that for interaction data, it is vital to take this into account.

We suggest that in addition to conducting power analyses when developing studies or assessing the feasibility of a study, our methods could also be used in post hoc or dynamic social network analyses where subsetting is required. It is common for long-term interaction data to be split up into multiple networks, often for the purposes of studying changes in social behaviour over time (Pinter-Wollman et al., 2014). Our methods could be used as a data-driven means to determine the amount of data required for each network, and therefore how many networks should be constructed. In this case a correlation of 0.99 could be considered to be a representative network by the arguments above, but again this may depend on the context.

The prevalence of  $p$ -values in the behavioural sciences has been widely criticised, and alternative hypothesis testing frameworks are becoming increasingly common in social network analysis (Cohen, 1994; Halsey, 2019; Franks et al., 2021). The concept of statistical power is directly tied to  $p$ -values and null hypothesis significance testing, and is therefore subject to the same criticism as  $p$ -values themselves. The criticisms of these concepts are valid, and there are many drawbacks to using arbitrary thresholds when conducting statistical analyses. Despite this, frequentist statistics and the  $p$ -value remain widely-used, and as long as this is the case, power analysis will remain a useful tool, and we believe the field of social network analysis can still benefit from its wider introduction.

Correlation is a familiar statistical concept, so using network correlation to quantify the impact of sampling on the accuracy of social networks is an attractive method. However, correlation on its own can only offer limited information about how useful a sampled network will be in further analyses. We used simulations in this study to estimate how network correlation relates to statistical power in nodal regression, but these simulations are limited to specific circumstances, under a number of assumptions. This will always be a limitation of simulation studies, and makes the generality of the results somewhat restricted. We have shown that the required level of network correlation is context dependent. This contrasts with some studies that have used Whitehead (2008)'s method to calculate correlation, and suggest a minimum acceptable level of correlation at 40% (Chabanne et al., 2017; Hawkins et al., 2020; Frau et al., 2021). Our results suggest a threshold value of 40% is not generally optimal when conducting nodal regressions, and that the true optimal could be higher or lower depending on the level of social differentiation and sampling effort.

We have made the code from this study publicly available, and our method of power analysis can be used for any prospective studies where interaction data will be collected, in post hoc analysis when reporting results, to indicate whether a null result may be due to insufficient sampling, and even when subsetting data to ensure sufficient data are used in each network. The diminishing returns method presented here for computing optimal correlation naturally encodes the cost of collecting behavioural data and provides a simple method for estimating required sampling effort without specifying addi-

tional parameters such as desired power. We believe its flexibility could prove it to be useful for a wide variety of social network analyses.

## **Author contributions**

MNW conceived of the negative binomial correlation method and JDAH conceived of the power analysis methods. JDAH derived the mathematics and implemented the simulations with input from MNW, DWF, and LJNB. The manuscript was written by JDAH with input from MNW, DWF, and LJNB.

## **Acknowledgments**

We would like to thank members of the CRAB Social Network Club for useful discussions on this topic. JDAH acknowledges funding from the Engineering and Physical Sciences Research Council [grant number EP/R513210/1]. LJNB acknowledges funding from a European Research Council Consolidator Grant (FriendOrigins - 864461). DWF and MNW acknowledge funding from the Natural Environment Research Council [grant number NE/S010327/1].

## References

- Bejder, L., Fletcher, D., and Bräger, S. (1998). A method for testing association patterns of social animals. *Animal Behaviour*, 56(3):719–725.
- Brask, J. B., Ellis, S., and Croft, D. P. (2021). Animal social networks: an introduction for complex systems scientists. *arXiv:2005.09598*. arXiv: 2005.09598.
- Brent, L. J. N., MacLarnon, A., Platt, M. L., and Semple, S. (2013). Seasonal changes in the structure of rhesus macaque social networks. *Behavioral Ecology and Sociobiology*, 67(3):349–359.
- Chabanne, D. B. H., Finn, H., and Bejder, L. (2017). Identifying the Relevant Local Population for Environmental Impact Assessments of Mobile Marine Fauna. *Frontiers in Marine Science*, 4. Publisher: Frontiers.
- Cleveland, W. S. (1979). Robust Locally Weighted Regression and Smoothing Scatterplots. *Journal of the American Statistical Association*, 74(368):829–836.
- Cohen, J. (1992). Statistical Power Analysis. *Current Directions in Psychological Science*, 1(3):98–101.
- Cohen, J. (1994). The earth is round ( $p < .05$ ). *American Psychologist*, 49(12):997–1003. Place: US Publisher: American Psychological Association.
- Cohen, J. (2013). *Statistical Power Analysis for the Behavioral Sciences*. Academic Press.
- Croft, D. P., James, R., and Krause, J. (2008). *Exploring Animal Social Networks*. Princeton University Press.
- Croft, D. P., Madden, J. R., Franks, D. W., and James, R. (2011). Hypothesis testing in animal social networks. *Trends in Ecology & Evolution*, 26(10):502–507.
- Ellis, S., Franks, D. W., Natrass, S., Cant, M. A., Weiss, M. N., Giles, D., Balcomb, K. C., and Croft, D. P. (2017). Mortality risk and social network position in resident killer whales: sex differences and the importance of resource abundance. *Proceedings of the Royal Society B: Biological Sciences*, 284(1865):20171313. Publisher: Royal Society.
- Evans, J. D. (1996). *Straightforward statistics for the behavioral sciences*. Straightforward statistics for the behavioral sciences. Thomson Brooks/Cole Publishing Co, Belmont, CA, US.
- Farine, D. R. and Whitehead, H. (2015). Constructing, conducting and interpreting animal social network analysis. *Journal of Animal Ecology*, 84(5):1144–1163.
- Findlay, R., Gennari, E., Cantor, M., and Tittensor, D. P. (2016). How solitary are white sharks: social interactions or just spatial proximity? *Behavioral Ecology and Sociobiology*, 70(10):1735–1744.
- Franks, D. W., Ruxton, G. D., and James, R. (2010). Sampling animal association networks with the gambit of the group. *Behavioral Ecology and Sociobiology*, 64(3):493–503.
- Franks, D. W., Weiss, M. N., Silk, M. J., Perryman, R. J. Y., and Croft, D. P. (2021). Calculating effect sizes in animal social network analysis. *Methods in Ecology and Evolution*, 12(1):33–41. \_eprint: <https://besjournals.onlinelibrary.wiley.com/doi/pdf/10.1111/2041-210X.13429>.

- Frau, S., Ronchetti, F., Perretti, F., Addis, A., Ceccherelli, G., and Manna, G. L. (2021). The influence of fish farm activity on the social structure of the common bottlenose dolphin in Sardinia (Italy). *PeerJ*, 9:e10960. Publisher: PeerJ Inc.
- Halsey, L. G. (2019). The reign of the p-value is over: what alternative analyses could we employ to fill the power vacuum? *Biology Letters*, 15(5):20190174. Publisher: Royal Society.
- Hammersley, J. (2013). *Monte Carlo Methods*. Springer Science & Business Media.
- Hawkins, E. R., Pogson-Manning, L., Jaehnichen, C., and Meager, J. J. (2020). Social dynamics and sexual segregation of Australian humpback dolphins (*Sousa sahulensis*) in Moreton Bay, Queensland. *Marine Mammal Science*, 36(2):500–521. \_eprint: <https://onlinelibrary.wiley.com/doi/pdf/10.1111/mms.12657>.
- James, R., Croft, D. P., and Krause, J. (2009). Potential banana skins in animal social network analysis. *Behavioral Ecology and Sociobiology*, 63(7):989–997.
- Krause, J., James, R., Franks, D. W., and Croft, D. P. (2015). *Animal Social Networks*. Oxford University Press.
- Martin, P., Bateson, P. P. G., and Bateson, P. (1993). *Measuring Behaviour: An Introductory Guide*. Cambridge University Press.
- Pinter-Wollman, N., Hobson, E. A., Smith, J. E., Edelman, A. J., Shizuka, D., de Silva, S., Waters, J. S., Prager, S. D., Sasaki, T., Wittemyer, G., Fewell, J., and McDonald, D. B. (2014). The dynamics of animal social networks: analytical, conceptual, and theoretical advances. *Behavioral Ecology*, 25(2):242–255.
- R Core Team (2013). R: A language and environment for statistical computing.
- Shephard, R. W. and Färe, R. (1974). The Law of Diminishing Returns. *Zeitschrift für Nationalökonomie/Journal of Economics*, (H. 1/2):69–90. Publisher: JSTOR.
- Stadtfeld, C., Snijders, T. A. B., Steglich, C., and van Duijn, M. (2020). Statistical Power in Longitudinal Network Studies. *Sociological Methods & Research*, 49(4):1103–1132.
- Weiss, M. N., Franks, D. W., Brent, L. J. N., Ellis, S., Silk, M. J., and Croft, D. P. (2021). Common datastream permutations of animal social network data are not appropriate for hypothesis testing using regression models. *Methods in Ecology and Evolution*, 12(2):255–265. \_eprint: <https://besjournals.onlinelibrary.wiley.com/doi/pdf/10.1111/2041-210X.13508>.
- Whitehead, H. (2008). Precision and power in the analysis of social structure using associations. *Animal Behaviour*, 75(3):1093–1099.

## Supplementary material: Power tables

### Nodal regression

| <i>n</i> | 0.1    | 0.2    | 0.3    | 0.4    | 0.5    | 0.6    | 0.7    | 0.8    | 0.9    |
|----------|--------|--------|--------|--------|--------|--------|--------|--------|--------|
| 10       | 0.275  | 0.4661 | 0.5517 | 0.6051 | 0.6519 | 0.7028 | 0.7553 | 0.8116 | 0.875  |
| 20       | 0.1965 | 0.3478 | 0.4629 | 0.5433 | 0.5992 | 0.6551 | 0.7113 | 0.7822 | 0.8625 |
| 50       | 0.1502 | 0.2683 | 0.3651 | 0.4352 | 0.492  | 0.5402 | 0.6015 | 0.6901 | 0.7974 |
| 100      | 0.1366 | 0.2513 | 0.3444 | 0.4217 | 0.4744 | 0.5264 | 0.5755 | 0.6537 | 0.764  |

Table 3: Correlation table showing the minimum required level of network correlation to achieve a given level of power for a number of individuals between 10 and 100 assuming the minimal effect size capable of producing maximum power.



## Supplementary material: Derivation of Equation 3

### Gamma-Poisson model

In Whitehead (2008), the population association indices are assumed to be distributed according to a beta distribution. The beta is defined on  $[0, 1]$ , making it ideal for modelling association indices that are strictly in the same range. However, when modelling interaction rates, any positive number of interaction rates can occur in an interval of time, so we propose using the gamma distribution to model the underlying “true” interaction rates of the population:

$$\lambda_{ij} \sim \text{Gamma}(\alpha, \beta)$$

where  $\lambda_{ij}$  is the interaction rate between individuals  $i$  and  $j$ , and  $\alpha, \beta > 0$  are parameters controlling the shape of the distribution. The observed number of interactions between  $i$  and  $j$ ,  $X_{ij}$  is an integer count variable, and should therefore be distributed according to a Poisson, depending on the time  $d_{ij}$  spent sampling the dyad  $(i, j)$ :

$$X_{ij} \sim \text{Poisson}(d_{ij}\lambda_{ij}).$$

Since  $d_{ij}$  is constant for any particular dyad, the distribution of  $d_{ij}\lambda_{ij}$  is given by

$$d_{ij}\lambda_{ij} \sim \text{Gamma}\left(\alpha, \frac{\beta}{d_{ij}}\right).$$

This type of model is known as a Gamma-Poisson mixture, and is equivalent to the conjugate distribution of a Poisson random variable with gamma priors (). The distribution of  $X_{ij}$  can be described by the negative binomial in terms of the gamma parameters  $\alpha, \beta$  and the sampling time  $d_{ij}$ :

$$X_{ij} \sim \text{NegativeBinomial}\left(\alpha, \frac{\beta}{\beta + d_{ij}}\right).$$

In empirical network studies, the interaction rate usually used is based on this sampled interaction count  $X_{ij}$ . The estimated interaction rate  $\hat{\lambda}_{ij}$  is defined as

$$\hat{\lambda}_{ij} = \frac{X_{ij}}{d_{ij}}.$$

### Estimating correlation

The goal of this study is to compute the correlation between the true and estimated interaction rates  $\lambda_{ij}$  and  $\hat{\lambda}_{ij}$  respectively. The Pearson correlation coefficient is defined by

$$\rho(x, y) = \frac{\text{Cov}(x, y)}{\sqrt{\text{Var}(x)\text{Var}(y)}}.$$

In the same way as Whitehead (2008), we assume that the random variables  $\lambda_{ij} \approx \hat{\lambda}_{ij}$ , allowing us to set  $\text{Cov}(\lambda_{ij}, \hat{\lambda}_{ij}) \approx \text{Var}(\lambda_{ij})$ , giving the following equation for correlation:

$$\rho(\lambda, \hat{\lambda}) \approx \frac{\sqrt{\text{Var}(\lambda)}}{\sqrt{\text{Var}(\hat{\lambda})}}.$$

This assumption was verified using the simulations shown in the main study. The variance of the true interaction rate is simply the variance of the gamma distribution:

$$\text{Var}(\lambda_{ij}) = \frac{\alpha}{\beta^2}$$

The variance of the estimated interaction rate is based on the variance of the negative binomial:

$$\begin{aligned} \text{Var}(\hat{\lambda}_{ij}) &= \text{Var}\left(\frac{X_{ij}}{d_{ij}}\right) \\ &= \frac{1}{d_{ij}^2} \text{Var}(X_{ij}) \\ &= \frac{\alpha(\beta + d_{ij})}{d_{ij}\beta} \end{aligned}$$

The total variance of the true interaction rate over the  $m$  dyads can now be written as:

$$\text{Var}(\lambda) = \frac{m\alpha}{\beta^2}.$$

The total variance of the estimated interaction rates is:

$$\begin{aligned} \text{Var}(\hat{\lambda}) &= \sum_{i,j} \frac{\alpha(\beta + d_{ij})}{d_{ij}\beta^2} \\ &= \frac{\alpha}{\beta^2} \left( m + \beta \sum_{i,j} \frac{1}{d_{ij}} \right). \end{aligned}$$

The variance ratio can now be written as:

$$\begin{aligned} \frac{\text{Var}(\lambda)}{\text{Var}(\hat{\lambda})} &= \frac{m\alpha}{\beta^2} \frac{\beta^2}{\alpha} \left( m + \beta \sum_{i,j} \frac{1}{d_{ij}} \right)^{-1} \\ &= \frac{m}{m + \beta \sum_{i,j} \frac{1}{d_{ij}}}. \end{aligned}$$

Now the correlation is given by

$$\rho(\lambda, \hat{\lambda}) = \sqrt{\frac{m}{m + \beta \sum_{i,j} \frac{1}{d_{ij}}}}.$$

The  $\alpha, \beta$  parameterisation of the gamma distribution is not especially biologically meaningful, so we use an alternative parameterisation in terms of the mean interaction rate  $\mu$  and social differentiation  $S$ . This parameterisation can be written for  $\alpha, \beta$  as:

$$\begin{aligned} \alpha &= \frac{1}{S^2} \\ \beta &= \frac{1}{S^2\mu}. \end{aligned}$$

The  $\sum_{i,j} \frac{1}{d_{ij}}$  term in the correlation equation is related to the harmonic mean  $H$  of the interaction rates:

$$H(d) = \frac{m}{\sum_{i,j} \frac{1}{d_{ij}}}.$$

By substituting in these three equations, we arrive at the final equation (Equation 3) for correlation:

$$\rho(\lambda, \hat{\lambda}) = \frac{S\sqrt{\mu H(d)}}{\sqrt{1 + \mu S^2 H(d)}} = \frac{S\sqrt{I}}{\sqrt{1 + S^2 I}}$$

where  $I = \mu H(d)$  is a term introduced to summarise the amount of sampling (we call it the sampling effort) for ease of interpretation.

## Likelihood estimator

To estimate the parameters of the gamma distribution, we cannot simply calculate the mean interaction rate and social differentiation of the estimated interaction rates, since they are subject to sampling error. Therefore we use our Gamma-Poisson model to estimate the parameters of the underlying “true” distribution of interaction rates. Unfortunately the maximum likelihood estimator of the negative binomial only exists for data where the sample variance is larger than the sample mean. This could be limiting in our case, so instead we use numerical maximum likelihood estimation. The log-likelihood of our model is derived from the likelihood of the negative binomial, and is given by

$$\ell(\alpha, \beta | X, d) = \sum_{i,j} \log \left[ \binom{\alpha + X_{ij} - 1}{X_{ij}} \left( \frac{\beta}{\beta + d_{ij}} \right)^{X_{ij}} \left( 1 - \frac{\beta}{\beta + d_{ij}} \right)^\alpha \right].$$

We used a numerical method (Nelder-Mead) to maximise the log-likelihood and estimate the parameters  $\alpha, \beta$ . The parameters  $\mu, S$  were calculated from these. Alternative methods such as Gibbs sampling can also be used to estimate the parameters, and would provide a credible interval estimates for the correlation. We did not use this method in our simulations because of both the computation time it would require, and the potential for errant chains, but have included it in the code and recommend its use for typical, one-off analyses where the diagnostics can be checked manually.

## MCMC estimation

To estimate the posterior distributions of the parameters of the gamma distribution, and hence the posterior distributions of social differentiation  $S$  and correlation  $\rho$ , we used Gibbs sampling. To ensure the MCMC chains fit well, we used weakly informative gamma priors over  $\alpha$  and  $\beta$ :

$$\begin{aligned} \alpha &\sim \text{Gamma}(a_1, b_1) \\ \beta &\sim \text{Gamma}(a_2, b_2) \end{aligned}$$

where  $a_1, a_2, b_1, b_2$  were chosen so that the mean of the parameters  $\alpha, \beta$  were equal to their numerical MLE estimates  $\hat{\alpha}, \hat{\beta}$ , and the coefficient of dispersion was  $\delta = 10$ . This means the hyperparameters are given by

$$b_1 = b_2 = \delta, \quad a_1 = \hat{\alpha} b_1, \quad a_2 = \hat{\beta} b_2.$$

## Supplementary material: Additional verification simulations

The model verification simulations were run for additional scenarios not shown in the main text.

### Beta Poisson

The gamma distribution is a natural choice for modelling lower-bounded rates thanks to its flexibility, however, it is technically possible for rates to be limited by an upper-bound. To test how well Equation 3 estimates correlation in this case, we used a Poisson model of interaction counts with interaction rates drawn from a beta distribution with a given mean  $\mu$  and social differentiation  $S$ .

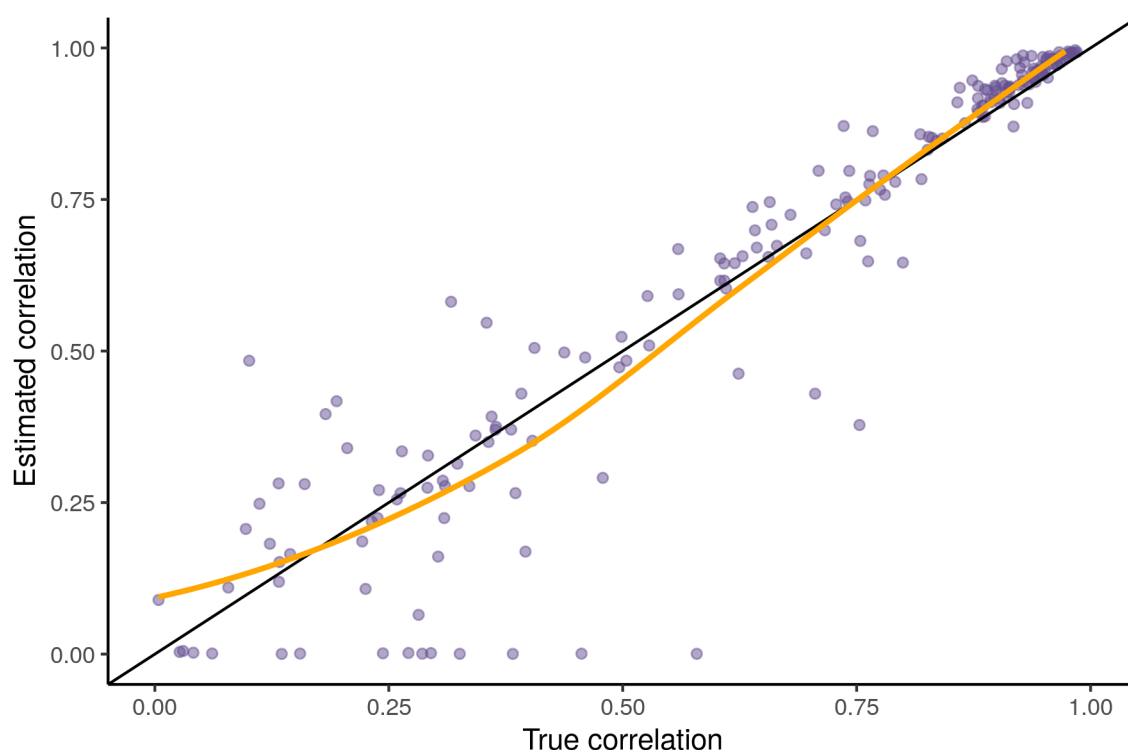

Figure 5: Estimated correlation against true correlation in the zero-inflated Poisson scenario. The estimated correlation values had a correlation of 96% with the true correlation values, and a mean absolute error of 3.5%.

Equation 3 performed well in the beta Poisson scenario. This might be because the gamma distribution can be similar in shape to the beta. This simulation confirms that this method of estimating correlation will work reasonably well for upper-bounded rates.

### Beta binomial

The original paper (Whitehead, 2008) assumes the data are distributed according to a binomial distribution with parameters given by a beta distribution. This is often relevant when using association indices such as the simple ratio index to estimate the proportion of time two individuals associate. With this type of data we recommend using the original method. However, we implemented a simulation of this kind of data to test how well our correlation estimate fares when its assumptions are

severely broken. In these simulations we set the mean interaction rate  $\mu$  and social differentiation  $S$  in the same way as the previous simulations. The results are shown in Figure 5.

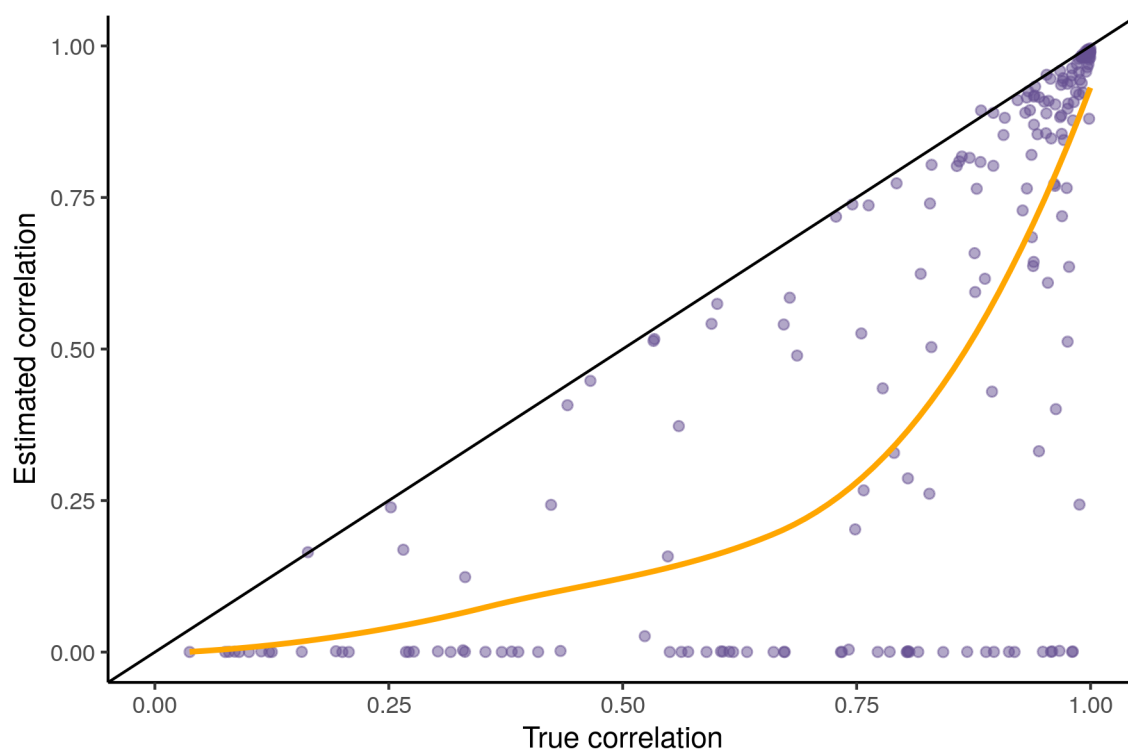

Figure 6: Estimated correlation against true correlation in the Beta binomial scenario. The correlation estimator performs poorly in this scenario, consistently underestimating the true correlation. In many cases a correlation of  $\rho = 0$  was predicted where the true correlation was anywhere between 0 and 1.

The poor performance of Equation 3 in this scenario was expected, since the simulation generates data consistent with binary sampling, whereas our correlation estimate assumes interaction count sampling. This means that most of the underlying assumptions are broken, making this equation for correlation not applicable to this type of data. This confirms that when using binary sampled data, Whitehead (2008)'s method should be used to calculate correlation, but when using interaction rate data, our Equation 3 should be used.

## Biased sampling

In many cases, sampling is uneven across individuals, and consequently some dyads may be more heavily sampled than others. Any biases in sampling should not effect our method since the harmonic mean, which is used to determine sampling effort ( $I = \mu H(d)$ ), is sensitive to imbalanced values, and will naturally capture biased sampling. To check this, we created a simulation like scenario 1, but where the number of samples  $d_{ij}$  is drawn from one of two Poisson distributions, one with mean  $D_{\text{low}} \in [1, 10]$ , and another with mean  $D_{\text{high}} \in [10, 100]$ .

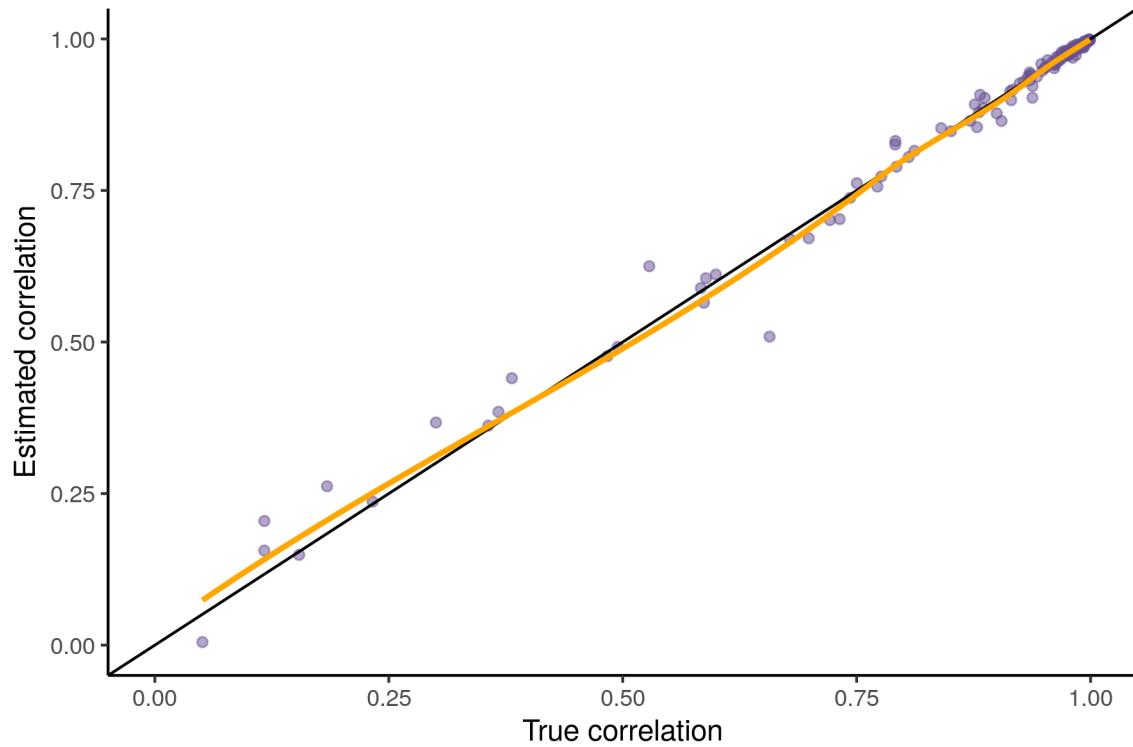

Figure 7: Estimated correlation against true correlation in the biased sampling scenario. The correlation estimator performs well in this scenario since none of the assumptions of the model are being broken.

The estimator performed well in this scenario, with a mean absolute error of 0.7% and an overall correlation of 99.5%. None of the assumptions of the model were broken by this scenario, so the estimator was expected to perform well here. This demonstrates that biased sampling will not affect the correlation estimate.

## Supplementary material: Nodal regression with eigenvector centrality

In the main text we used strength to assess the power of nodal regression, but the choice of network metric should not affect the results since the effect size was calculated relative to the metric when estimating the effect size required for  $\approx 100\%$  power. To verify this, we ran the simulations with eigenvector centrality as the network metric. These simulations replicated our results, showing that the results should hold for any custom power analysis run using our code.

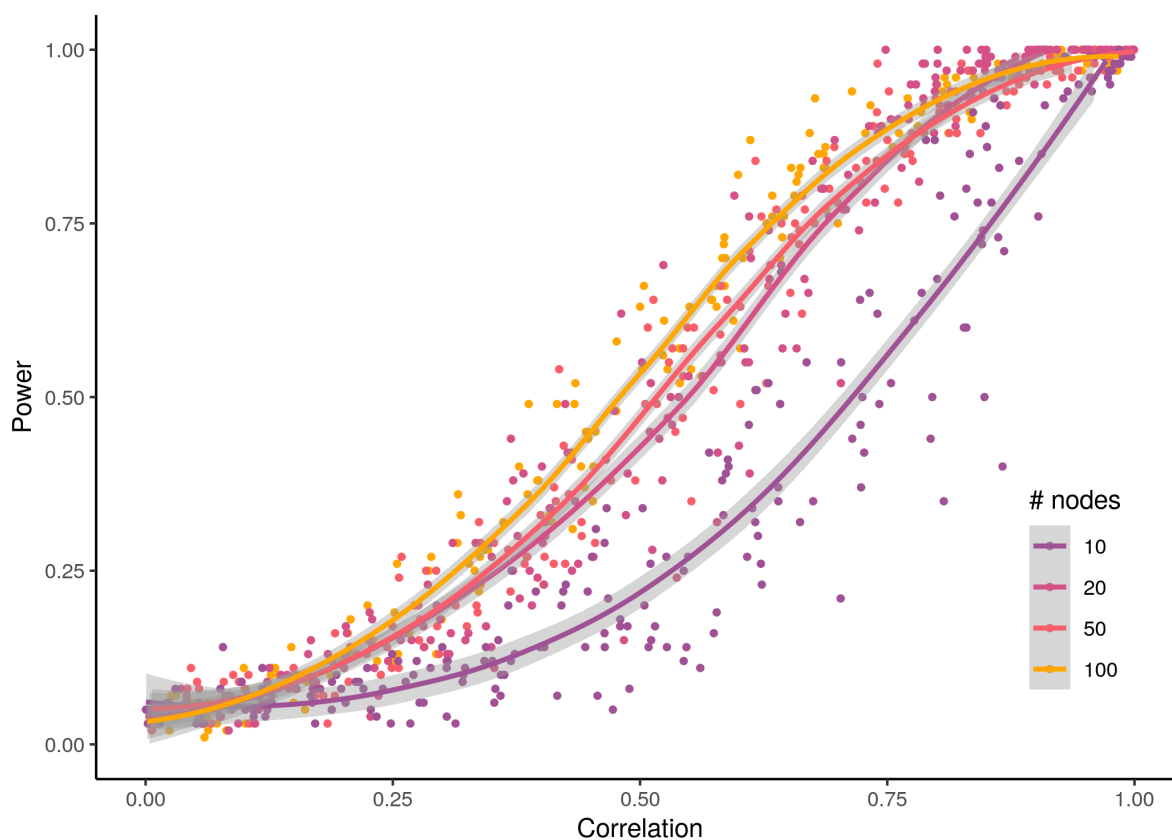

Figure 8: Relationship between power and correlation for different numbers of nodes in nodal regression simulations with eigenvector as the predictor variable.

## Supplementary material: Effect of $\rho_{\text{MAX}}$ on optimal correlation estimate

The generic diminishing returns method relies on a free parameter  $\rho_{\text{MAX}}$  indicating the effective maximum amount of correlation that is biologically relevant. In the main text we used  $\rho_{\text{MAX}} = 0.99$ , but any value between 0 and 1 could theoretically be used. Values of  $\rho_{\text{MAX}}$  close to 0 might not be advisable, but there is scope for parameter choice for values of  $\rho_{\text{MAX}}$  closer to 1. To evaluate the effect of parameter choice on the classifier, we repeated Simulation 3 for three values:  $\rho_{\text{MAX}} \in \{0.9, 0.99, 0.999\}$ . These values were chosen to have different orders of magnitude difference to 1 to show the realistic maximum range of the classifier.

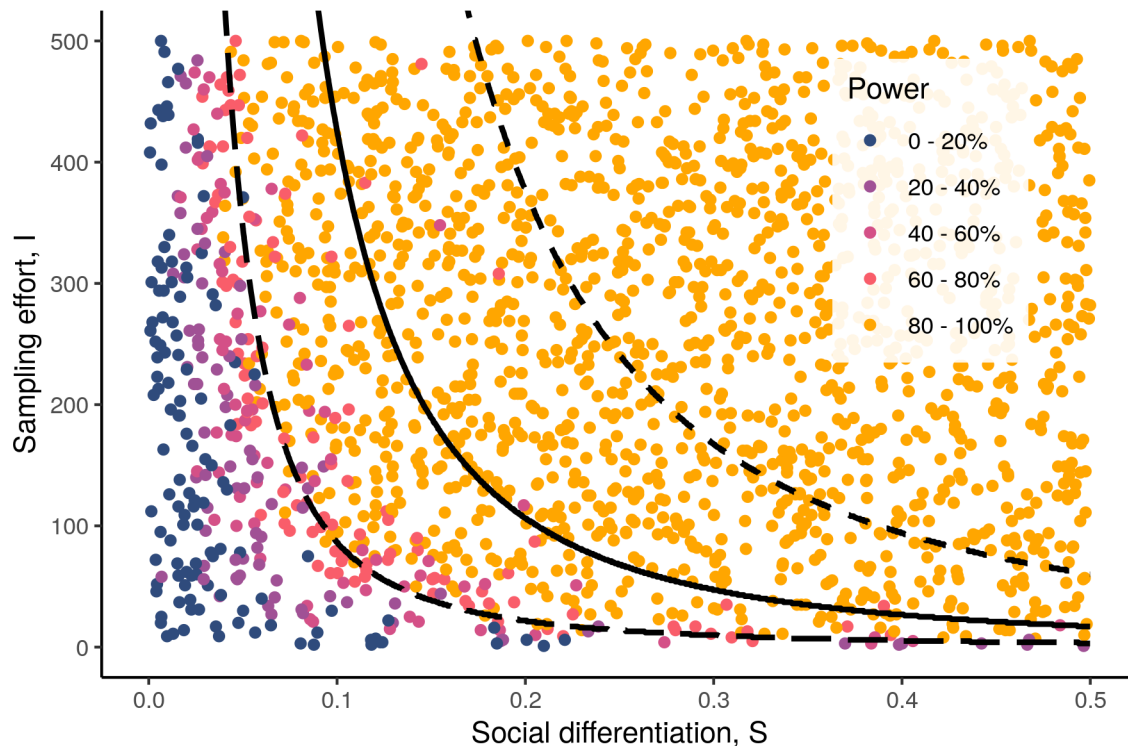

Figure 9: Simulation 3 was re-run for three different values of  $\rho_{\text{MAX}} \in \{0.9, 0.99, 0.999\}$  to test the sensitivity of the diminishing returns method to parameter choices with different orders of magnitude difference to 100% correlation. The solid black line indicates the value of  $\rho_{\text{MAX}} = 0.99$  used in the main text, the long dashed line indicates  $\rho_{\text{MAX}} = 0.9$ , and the short dashed line indicates  $\rho_{\text{MAX}} = 0.999$ .

The parameter choice makes of  $\rho_{\text{MAX}}$  a significant impact on the classifier. A parameter value of  $\rho_{\text{MAX}} = 0.90$  yielded a classifier closely matching the 80% power boundary for the nodal regression simulations, whereas the higher value  $\rho_{\text{MAX}} = 0.999$  was extremely conservative, suggesting much higher sampling efforts than required to attain a high level of power. These results are difficult to extrapolate to other contexts, but by keeping the definition of  $\rho_{\text{MAX}}$  as the maximum correlation of biological relevance, this method can be used to provide guidance on the required sampling effort for a given level of social differentiation.
